# Supplementary material
Source: PubMed Central journal article supplement (PMC5038283)
Supplement: AAC.00889-16_zac010165522so1.pdf [file AAC.00889-16_zac010165522so1.pdf]

1 **Supplemental File** (contains Text, References and Tables S1, S2, S3)

2 **Experimental procedure**

3 **Bacterial strains, culture and selection conditions, and antibiotics**

4 Selection and screening was carried out in *E. coli* K-12 substrate MG1655 (NCBI uid57779) and in the  
5 ciprofloxacin resistant mutants derived from it. All manipulations with bacterial cultures were done on  
6 Luria–Bertani (LB) agar plates or in LB broth. A mutant resistant to high concentration of ciprofloxacin (MIC  
7  $\geq 24$   $\mu\text{g/ml}$ ) was selected in 4 steps by successive passaging of overnight cultures from a preceding selection  
8 stage on plates supplemented with ciprofloxacin at 0.03  $\mu\text{g/ml}$  (step 1), 0.25  $\mu\text{g/ml}$  (step 2), 1  $\mu\text{g/ml}$  (step  
9 3) and 8  $\mu\text{g/ml}$  (step 4). Clones selected from each step, designated rCip-0.03, rCip-0.25, rCip-1 and rCip-8,  
10 were frozen from overnight cultures and kept in 15% Glycerol at  $-80$   $^{\circ}\text{C}$ .

11 MFD*pir* strain (1) (a gift from Russel Monds, Stanford University) used in conjugative transposon transfer  
12 (see below) was grown in the medium supplemented with 0.3 mM diaminopimelic acid, DAP (Sigma-  
13 Aldrich, St. Louis, MO).

14 Kanamycin (Teknova, Hollister, CA) was added when necessary to liquid or solid media to a final  
15 concentration of 50  $\mu\text{g/ml}$ . Ciprofloxacin (LKT laboratories, St. Paul, MN) was used in a range of final  
16 concentrations between 10 – 30,000  $\text{ng/ml}$ .

17

18 **Determining the minimal inhibitory concentration (MIC) of ciprofloxacin**

19 MIC values of ciprofloxacin for parental and resistant strains were determined using a procedure described  
20 by Wiegand et al. (2). Briefly, cultures were maintained in early- to mid-exponential phase for at least 6  
21 generations before the MIC test. Serial dilutions ranging from  $10^2$  –  $10^7$  cells per ml were prepared in saline  
22 and 10  $\mu\text{l}$  suspension of each dilution was spotted on LB agar plate containing the antibiotic at a given  
23 concentration. MIC was estimated as the lowest concentration of ciprofloxacin in a series of concentrations  
24 (with 2-fold increment, for concentrations  $\leq 500$   $\text{ng/ml}$ , and with 1  $\mu\text{g/ml}$  increment, for concentrations  $\geq 1$   
25  $\mu\text{g/ml}$ ) at which patches with  $10^4$  and fewer cells showed no visible growth after 48 h incubation at 37  $^{\circ}\text{C}$ .  
26 These estimates have been corroborated by a liquid assay. The effects of knock-outs and deletions on MIC  
27 were tested in MG1655 and BW25113 genetic backgrounds.

28

## 29 **Conjugation and construction of a transposon library**

30 The plasmid pEB001 (3) carrying a modified version of the transposon delivery vector pMiniHimar RB1 (4)  
31 was transformed into MFD*pir*. The resulting strain MFD*pir*-pEB001 was used as a donor in the following  
32 conjugation procedure. An overnight culture of the rCip-8 mutant strain (1.4 ml) was heat shocked at 42 °C  
33 for 5 min and mixed with a pellet obtained by centrifuging 140 µl of an overnight culture of MFD*pir*-  
34 pEB001. The mixture was centrifuged and resuspended in 100 µl of LB+DAP, then 10 µl was spotted on an  
35 LB+DAP agar plate. After mating at 30 °C overnight, the cells were scraped from plates, resuspended in LB,  
36 and spread on LB with 50 µg/ml kanamycin for selection and recovery. Approximately 60,000 colonies were  
37 collected for a transposon library. The library was stored at -80 °C in LB supplemented with kanamycin (50  
38 µg/ml) and 15% glycerol. A transposon library in the MG1655 parental (ciprofloxacin susceptible) strain was  
39 constructed in the same way.

40

## 41 **Library screening**

42 An aliquot of frozen transposon library stock of the strain rCip-8 was thawed at 37 °C and diluted to OD<sub>600</sub>  
43 of 0.16 using LB with 50 µg/ml kanamycin. The culture was incubated for 1 h at 37 °C with aeration at 260  
44 rpm, at which point a  $t_0$  sample was collected. The rest of the culture was diluted to OD<sub>600</sub> of 0.05 and  
45 divided into two sub-cultures. Ciprofloxacin was added to a final concentration of 4 µg/ml to one and no  
46 drug was added to the other. Sub-cultures were maintained in exponential phase, with or without  
47 ciprofloxacin, by repeated dilutions in a constant volume. A  $t_1$  samples for both the drug exposed and no-  
48 drug sub-cultures were collected after 10 doublings. The library of MG1655 was processed in a similar way,  
49 except that the culture was propagated without ciprofloxacin in the medium and, as a result, only one  $t_1$   
50 sample had to be collected. Untreated controls were processed in the same way. Pelleted samples were  
51 stored at -80 °C until the next step. The screen was done in 3 replicates, where  $t_0$  samples were obtained  
52 from different aliquots of the original libraries.

53

## 54 **Sample preparation for Illumina sequencing and data processing**

55 Genomic DNA was extracted from the  $t_0$  and  $t_1$  samples using the Wizard® genomic DNA purification kit  
56 (Promega, Madison, WI) and processed as previously described (5) except that the adaptors had the  
57 following sequences:

58 p5\_side\_generic: /5Phos/CTGTCTCTTATACACATCTGACGCTGCCGACGA

59 p5\_side\_NN:TCGTCGGCAGCGTCAGATGTGTATAAGAGACAGNN.

60 The enrichment PCR was carried out using primers with following sequences:

61 p5\_primer 1: 5'-GTCTCGTGGGCTCGGAGATGTGTATAAGAGACAGAGACCGGGGACTTATCATCCAACCTGT

62 p7\_side\_Magellan\_enrichment\_primer: 5'-TCGTCGGCAGCGTCAGATGTGTATAA.

63 18 samples were indexed using forward: 5'-AATGATACGGCGACCACCGAGATCTACAC[i5]TCGTCGGCAGCGTC  
64 and reverse indexing primer: 5'-CAAGCAGAAGACGGCATAACGAGAT[i7]GTCTCGTGGGCTCGG.

65 Pooled 18 libraries were sequenced in one lane as 50 bp single end reads using HiSeq2500 at the University  
66 of Minnesota Genomics Center.

67 Following de-multiplexing, the reads were trimmed and the transposon-specific sequence was removed  
68 using FASTX-Toolkit ([http://hannonlab.cshl.edu/fastx\\_toolkit/index.html](http://hannonlab.cshl.edu/fastx_toolkit/index.html)). Resulting reads were mapped to  
69 the MG1655 genome using Bowtie 2 (6, 7). The SAM files of mapped reads were converted to BAM format  
70 and sorted using SAMTOOLS (8). The sorted BAM files were converted to BED files and intersections with  
71 annotated ORF's were enumerated using BEDTOOLS (9). A final dataset for each sample contained two  
72 metrics for each ORF: counts - the number of times transposon-linked reads overlapped with the ORF; and  
73 coverage – the fraction of base pairs within the ORF that overlapped with the reads.

74

## 75 **Experimental design**

76 The objective was to identify genes whose inactivation in the genome of a highly ciprofloxacin resistant *E.*  
77 *coli* would lead to sensitization of the resistant strain to the drug. By definition, antibiotic resistant mutants  
78 can grow and divide when the antibiotic is present in the media at below MIC levels. Mutations that lead to  
79 the reduction of MIC may interfere with growth and/or division at antibiotic concentrations that are fully  
80 tolerated by the resistant parent strain. Therefore, cells carrying the MIC lowering mutations will be  
81 relatively disadvantaged in presence of the antibiotic, compared to the cells that do not carry such  
82 mutations, and will be depleted from the antibiotic exposed population over time. However growth  
83 deficiencies of individual mutant cells may or may not be related to the effect of an antibiotic. Hence, it is  
84 imperative to account for such antibiotic unrelated growth variations in an experimental design (Fig. 1).  
85 Thus, we set out to determine the abundance of mutant alleles in the samples of the drug resistant mutant  
86 before exposure to ciprofloxacin, after exposure to the drug for 10 generations and after 10 generations  
87 without the drug. Additionally, we have examined the mutant allele abundances in a ciprofloxacin sensitive,  
88 wild type strain from which the resistant strain has originated. To achieve the experimental objective, we

89 had to identify mutant alleles whose abundance in a population of ciprofloxacin-exposed cells decreased  
90 after 10 generations significantly more than in populations grown without the antibiotic.

91 Quantifiable mutant alleles were generated by saturation transposon mutagenesis using a modified  
92 mariner transposon (3, 4). Following transposon mobilization, approximately 60,000 transposon insertion  
93 mutants of the ciprofloxacin resistant strain and about the same number of its drug sensitive parent have  
94 been pooled into two separate mutant libraries. 10% (by biomass) of the libraries were used as  $t_0$  samples  
95 in the selection experiments, to improve the chances of representative sampling of the mutant  
96 populations. 1.8 - 4.4 million reads were mapped to 4516 ORF's annotated in the genome of MG1655  
97 (Table 1S), with an average number of insertions per gene varying between 400 and 958. To assess the  
98 genetic quality of the libraries, we evaluated the distribution of insertions in two groups of genes: a set of  
99 essential genes in LB (264 genes), consistent between two independent studies of essentiality of *E. coli*  
100 genes in rich growth media (10, 11), and its complement (4252 genes), defined as all genes in the genome  
101 that did not make it onto the common set of essential genes. The qualitative analysis revealed that the  
102 transposon insertions were found on average much less frequently (at least an order of magnitude) and in a  
103 smaller ORF portion (about 10 times) in essential genes compared to non-essential ones (Table 1S).  
104 Furthermore, we observed, using average metrics as classification cut-offs, that less than 1.1% of essential  
105 genes were likely to be classified as non-essential and at most 5.1% of non-essential genes were likely to be  
106 classified as essential. This statistical summary indicates that the distribution of mutations in sampled  
107 libraries is sufficiently random, representative, and comports with biological expectations.

108

## 110 REFERENCES

- 111 1. **Ferrieres L, Hemery G, Nham T, Guerout AM, Mazel D, Beloin C, Ghigo JM.** 2010. Silent mischief:  
112 bacteriophage Mu insertions contaminate products of Escherichia coli random mutagenesis performed using  
113 suicidal transposon delivery plasmids mobilized by broad-host-range RP4 conjugative machinery. *J Bacteriol*  
114 **192**:6418-6427.
- 115 2. **Wiegand I, Hilpert K, Hancock RE.** 2008. Agar and broth dilution methods to determine the minimal  
116 inhibitory concentration (MIC) of antimicrobial substances. *Nat Protoc* **3**:163-175.
- 117 3. **Brutinel ED, Gralnick JA.** 2012. Anomalies of the anaerobic tricarboxylic acid cycle in *Shewanella oneidensis*  
118 revealed by Tn-seq. *Mol Microbiol* **86**:273-283.
- 119 4. **Bouhenni R, Gehrke A, Saffarini D.** 2005. Identification of genes involved in cytochrome c biogenesis in  
120 *Shewanella oneidensis*, using a modified mariner transposon. *Appl Environ Microbiol* **71**:4935-4937.
- 121 5. **van Opijnen T, Camilli A.** 2010. Genome-wide fitness and genetic interactions determined by Tn-seq, a high-  
122 throughput massively parallel sequencing method for microorganisms. *Curr Protoc Microbiol* **Chapter**  
123 **1**:Unit1E 3.
- 124 6. **Langmead B.** 2010. Aligning short sequencing reads with Bowtie. *Curr Protoc Bioinformatics* **Chapter 11**:Unit  
125 11 17.
- 126 7. **Langmead B, Salzberg SL.** 2012. Fast gapped-read alignment with Bowtie 2. *Nat Methods* **9**:357-359.
- 127 8. **Li H, Handsaker B, Wysoker A, Fennell T, Ruan J, Homer N, Marth G, Abecasis G, Durbin R.** 2009. The  
128 Sequence Alignment/Map format and SAMtools. *Bioinformatics* **25**:2078-2079.
- 129 9. **Quinlan AR, Hall IM.** 2010. BEDTools: a flexible suite of utilities for comparing genomic features.  
130 *Bioinformatics* **26**:841-842.
- 131 10. **Baba T, Ara T, Hasegawa M, Takai Y, Okumura Y, Baba M, Datsenko KA, Tomita M, Wanner BL, Mori H.**  
132 2006. Construction of *Escherichia coli* K-12 in-frame, single-gene knockout mutants: the Keio collection. *Mol*  
133 *Syst Biol* **2**:2006 0008.
- 134 11. **Gerdes SY, Scholle MD, Campbell JW, Balazsi G, Ravasz E, Daugherty MD, Somera AL, Kyrpides NC,**  
135 **Anderson I, Gelfand MS, Bhattacharya A, Kapatral V, D'Souza M, Baev MV, Grechkin Y, Mseeh F, Fonstein**  
136 **MY, Overbeek R, Barabasi AL, Oltvai ZN, Osterman AL.** 2003. Experimental determination and system level  
137 analysis of essential genes in *Escherichia coli* MG1655. *J Bacteriol* **185**:5673-5684.
- 138  
139  
140  
141

142 **Table S1. Benchmarks of transposon insertion libraries before selection**

|                                                    | Metric             | Gene class       | Cipt <sub>t01</sub> +D <sup>5</sup> | Cipt <sub>t02</sub> +D | Cipt <sub>t03</sub> +D | Cipt <sub>t01</sub> | Cipt <sub>t02</sub> | Cipt <sub>t03</sub> | Wt-t <sub>01</sub> | Wt-t <sub>02</sub> | Wt-t <sub>03</sub> |
|----------------------------------------------------|--------------------|------------------|-------------------------------------|------------------------|------------------------|---------------------|---------------------|---------------------|--------------------|--------------------|--------------------|
| Mean                                               | count <sup>1</sup> | Nes <sup>2</sup> | 234.1                               | 234.2                  | 234.08                 | 234.11              | 234.16              | 234.15              | 234.13             | 234.05             | 234.15             |
|                                                    |                    | Es <sup>3</sup>  | 16.92                               | 15.43                  | 17.42                  | 17.04               | 16.19               | 16.31               | 16.7               | 18.14              | 16.35              |
|                                                    | breadth            | Nes              | 21.29%                              | 19.18%                 | 21.04%                 | 21.42%              | 21.65%              | 24.02%              | 30.72%             | 27.46%             | 28.62%             |
|                                                    |                    | Es               | 2.81%                               | 2.14%                  | 2.55%                  | 2.49%               | 2.74%               | 3.42%               | 3.22%              | 2.99%              | 3.16%              |
| Median                                             | count              | Nes              | 153.69                              | 151.25                 | 158.36                 | 153.33              | 154.48              | 154.58              | 132.94             | 128.44             | 132.72             |
|                                                    |                    | Es               | 0.63                                | 0.62                   | 0.48                   | 0.47                | 0.39                | 0.69                | 1.68               | 1.66               | 2.06               |
|                                                    | breadth            | Nes              | 20.27%                              | 18.32%                 | 20.07%                 | 20.53%              | 20.61%              | 23.12%              | 30.47%             | 26.93%             | 28.32%             |
|                                                    |                    | Es               | 1.85%                               | 0.61%                  | 1.42%                  | 1.42%               | 1.41%               | 2.20%               | 1.68%              | 1.39%              | 1.64%              |
| fr <sub>nes</sub> < Mean(Es_count&br) <sup>4</sup> |                    |                  | 0.044                               | 0.051                  | 0.048                  | 0.046               | 0.048               | 0.038               | 0.033              | 0.038              | 0.037              |
| fr <sub>es</sub> > Mean(Nes_count&br)              |                    |                  | 0.004                               | 0.008                  | 0.008                  | 0.008               | 0.008               | 0.008               | 0.008              | 0.004              | 0.011              |
| Total reads mapped to ORFs                         |                    |                  | 3.19E+06                            | 1.62E+06               | 2.06E+06               | 2.14E+06            | 2.59E+06            | 4.33E+06            | 2.38E+06           | 1.81E+06           | 1.94E+06           |

143 1 – normalized to one million reads; 2 – Non-essential genes (Nes); 3 – essential genes (Es); 4 – fraction of all non-  
 144 essential genes in the set with insertion count and breadth of coverage less than the corresponding means for the  
 145 essential gene set; 5 – a time point 0 sample of rCip-8.0 mutant with Ciprofloxacin (+D) added.

146

147

148

149

150

151 **Table S2. Summary of predicted suppressors and their verification**

| Class <sup>1</sup> | Number of mutants | Number with reduced MIC <sup>2</sup> | True Positives, % |
|--------------------|-------------------|--------------------------------------|-------------------|
| 1                  | 26                | 16                                   | 61.54%            |
| 2                  | 26                | 3                                    | 11.54%            |
| Total              | 52                | 19                                   | 36.54%            |

152 <sup>1</sup> - see text for class definitions; <sup>2</sup> - at least 2-fold reduction was observed in multiple tests.

153

| Name of the deleted gene | t0 Counts, average | t0 Breadth of coverage, average | Fitness Score | MIC of deletion mutant , average | Predicted suppressor in rCip-8 | Suppressor in sensitive wild type | Confirmed inference from the present study |
|--------------------------|--------------------|---------------------------------|---------------|----------------------------------|--------------------------------|-----------------------------------|--------------------------------------------|
| <i>xseB</i>              | 0.05               | 0.01                            | 0             | 12                               | No                             | Yes                               | FALSE NEGATIVE                             |
| <i>ruvA</i>              | 0.24               | 0.01                            | 0             | 5                                | No                             | Yes                               | FALSE NEGATIVE                             |
| <i>fis</i>               | 0.27               | 0.03                            | 0             | 16                               | No                             | Yes                               | FALSE NEGATIVE                             |
| <i>ruvC</i>              | 0.44               | 0.05                            | 0             | 6                                | No                             | Yes                               | FALSE NEGATIVE                             |
| <i>rseA</i>              | 241.32             | 0.22                            | 0.6           | 16                               | No                             | Yes                               | FALSE NEGATIVE                             |
| <i>ygcO</i>              | 142.38             | 0.23                            | 0.9           | 32                               | No                             | Yes                               | TRUE NEGATIVE                              |
| <i>ihfA</i>              | 145.95             | 0.22                            | 1.1           | 32                               | No                             | Yes                               | TRUE NEGATIVE                              |
| <i>ycjU</i>              | 170.03             | 0.13                            | 1.1           | 30                               | No                             | Yes                               | TRUE NEGATIVE                              |
| <i>rimK</i>              | 191.21             | 0.14                            | 1.2           | 30                               | No                             | Yes                               | TRUE NEGATIVE                              |
| <i>yciT</i>              | 126.2              | 0.2                             | 1             | 28                               | No                             | Yes                               | TRUE NEGATIVE                              |
| <i>ybgF</i>              | 141.57             | 0.21                            | 1.4           | 28                               | No                             | Yes                               | TRUE NEGATIVE                              |
| <i>ybgC</i>              | 175.96             | 0.37                            | 0.9           | 32                               | No                             | Yes                               | TRUE NEGATIVE                              |
| <i>qmcA</i>              | 310.54             | 0.3                             | 0.9           | 28                               | No                             | Yes                               | TRUE NEGATIVE                              |
| <i>yjjY</i>              | 319.88             | 0.49                            | 0.7           | 36                               | No                             | Yes                               | TRUE NEGATIVE                              |
| <i>hrpA</i>              | 387.16             | 0.14                            | 0.9           | 28                               | No                             | Yes                               | TRUE NEGATIVE                              |
| <i>yciM</i>              | 203.34             | 0.23                            | 2.4           | 16                               | Yes                            | Yes                               | TRUE POSITIVE                              |
| <i>dksA</i>              | 109.22             | 0.15                            | 3.1           | 16                               | Yes                            | Yes                               | TRUE POSITIVE                              |
| <i>hfq</i>               | 121.37             | 0.16                            | 5.1           | 8                                | Yes                            | Yes                               | TRUE POSITIVE                              |
| <i>recG</i>              | 144.51             | 0.11                            | 6.4           | 6                                | Yes                            | Yes                               | TRUE POSITIVE                              |
| <i>recB</i>              | 146.7              | 0.06                            | 8.2           | 4                                | Yes                            | Yes                               | TRUE POSITIVE                              |
| <i>recA</i>              | 151.05             | 0.11                            | 3.2           | 8                                | Yes                            | Yes                               | TRUE POSITIVE                              |
| <i>recC</i>              | 163.14             | 0.09                            | 9.2           | 4                                | Yes                            | Yes                               | TRUE POSITIVE                              |
| <i>xseA</i>              | 176.05             | 0.19                            | 3.6           | 12                               | Yes                            | Yes                               | TRUE POSITIVE                              |
| <i>tolC</i>              | 236.53             | 0.16                            | 27.9          | 1                                | Yes                            | Yes                               | TRUE POSITIVE                              |
| <i>recN</i>              | 506.36             | 0.23                            | 2.4           | 16                               | Yes                            | Yes                               | TRUE POSITIVE                              |
| <i>acrA</i>              | 513.53             | 0.22                            | 23.6          | 1                                | Yes                            | Yes                               | TRUE POSITIVE                              |
| <i>acrB</i>              | 735.64             | 0.14                            | 33.6          | 1                                | Yes                            | Yes                               | TRUE POSITIVE                              |
| <i>uvrD</i>              | 796.94             | 0.22                            | 4.1           | 8                                | Yes                            | Yes                               | TRUE POSITIVE                              |
| <i>yciS</i>              | 202.23             | 0.21                            | 4.1           | 10                               | Yes                            | No                                | TRUE POSITIVE                              |
| <i>miaA</i>              | 207.57             | 0.22                            | 3.3           | 16                               | Yes                            | No                                | TRUE POSITIVE                              |
| <i>hofO</i>              | 212.15             | 0.22                            | 1.9           | 20                               | Yes                            | No                                | TRUE POSITIVE                              |
| <i>ygaH</i>              | 272.31             | 0.25                            | 2.3           | 16                               | Yes                            | No                                | TRUE POSITIVE                              |
| <i>lpxM</i>              | 292.39             | 0.24                            | 2.8           | 16                               | Yes                            | No                                | TRUE POSITIVE                              |
| <i>marA</i>              | 341.54             | 0.46                            | 6.3           | 8                                | Yes                            | No                                | TRUE POSITIVE                              |
